# Supplementary material for: Changing men or changing health systems? A scoping review of interventions, services and programmes targeting men’s health in sub-Saharan Africa
Source: PubMed Central journal article supplement (PMC8011198; doi:10.1186/s12939-021-01428-z), 2021-03-31
Supplement: 12939_2021_1428_MOESM1_ESM.pdf [file 12939_2021_1428_MOESM1_ESM.pdf]

*Appendix 1: Example of a search conducted on Medline (via EBSCOhost) on 22/05/19*

| #   | Query                                                                                                                                                                                                                                                                                                                                                                                                                                                                                                                                                                          | Results   |
|-----|--------------------------------------------------------------------------------------------------------------------------------------------------------------------------------------------------------------------------------------------------------------------------------------------------------------------------------------------------------------------------------------------------------------------------------------------------------------------------------------------------------------------------------------------------------------------------------|-----------|
| S19 | S14 AND S15 AND S16 AND S17 Limiters - Date of Publication: 20000101-20190531; Age Related: Adolescent: 13-18 years, All Adult: 19+ years; Language: English, French, Portuguese                                                                                                                                                                                                                                                                                                                                                                                               | 45        |
| S18 | S14 AND S15 AND S16 AND S17                                                                                                                                                                                                                                                                                                                                                                                                                                                                                                                                                    | 57        |
| S17 | S10 OR S11 OR S12 OR S13                                                                                                                                                                                                                                                                                                                                                                                                                                                                                                                                                       | 150,504   |
| S16 | S5 OR S6 OR S7 OR S8 OR S9                                                                                                                                                                                                                                                                                                                                                                                                                                                                                                                                                     | 522,053   |
| S15 | S1 OR S2 OR S3 OR S4                                                                                                                                                                                                                                                                                                                                                                                                                                                                                                                                                           | 2,379,219 |
| S14 | (MH "Men's Health") OR "men's health" OR (MH "Men")                                                                                                                                                                                                                                                                                                                                                                                                                                                                                                                            | 6,678     |
| S13 | (MH "Information Seeking Behavior) OR "health* information seeking"                                                                                                                                                                                                                                                                                                                                                                                                                                                                                                            | 2,301     |
| S12 | (MH "Health Knowledge, Attitudes, Practice") OR "health* knowledge"                                                                                                                                                                                                                                                                                                                                                                                                                                                                                                            | 104,928   |
| S11 | (MH "Health Literacy") OR "health* literacy"                                                                                                                                                                                                                                                                                                                                                                                                                                                                                                                                   | 8,674     |
| S10 | (MH "Patient Acceptance of Health Care") OR "health* seeking"                                                                                                                                                                                                                                                                                                                                                                                                                                                                                                                  | 44,131    |
| S9  | Angola OR Benin OR Botswana OR "Burkina Faso" OR Burundi OR "Cabo Verde" OR Cameroon OR "Central African Republic" OR Chad OR Congo OR "Cote d'Ivoire" OR "Ivory Coast" OR Eritrea OR Ethiopia OR Gabon OR Gambia OR Ghana OR Guinea OR Kenya OR Lesotho OR Liberia OR Madagascar OR Malawi OR Mali OR Mauritania OR Mauritius OR Mozambique OR Namibia OR Niger OR Nigeria OR Rwanda OR "Sao Tome and Principe" OR Senegal OR Seychelles OR "Sierra Leone" OR Somalia OR "South Africa" OR Sudan OR Swaziland OR Eswatini OR Tanzania OR Togo OR Uganda OR Zambia OR Zimbabwe | 502,022   |
| S8  | subSahara* OR sub-Sahara* OR "sub Sahara*" OR "South of the Sahara"                                                                                                                                                                                                                                                                                                                                                                                                                                                                                                            | 31,008    |
| S7  | "South Africa*" OR "South of Africa" OR "Southern Africa*"                                                                                                                                                                                                                                                                                                                                                                                                                                                                                                                     | 107,091   |
| S6  | "East Africa*" OR "East of Africa" OR "Eastern Africa*"                                                                                                                                                                                                                                                                                                                                                                                                                                                                                                                        | 10,895    |
| S5  | "West Africa*" OR "West of Africa" OR "Western Africa*"                                                                                                                                                                                                                                                                                                                                                                                                                                                                                                                        | 15,505    |
| S4  | "health service*"                                                                                                                                                                                                                                                                                                                                                                                                                                                                                                                                                              | 480,058   |
| S3  | (MH "Government Programs") OR (MH "National Health Programs") OR "program*"                                                                                                                                                                                                                                                                                                                                                                                                                                                                                                    | 1,269,396 |
| S2  | "campaign"                                                                                                                                                                                                                                                                                                                                                                                                                                                                                                                                                                     | 28,057    |
| S1  | "intervention*"                                                                                                                                                                                                                                                                                                                                                                                                                                                                                                                                                                | 907,635   |
