# Supplementary material for: Changing men or changing health systems? A scoping review of interventions, services and programmes targeting men’s health in sub-Saharan Africa
Source: PubMed Central journal article supplement (PMC8011198; doi:10.1186/s12939-021-01428-z), 2021-03-31
Supplement: 12939_2021_1428_MOESM2_ESM.pdf [file 12939_2021_1428_MOESM2_ESM.pdf]

*Appendix 3 Data extraction framework*

| <b>Main category</b>                         | <b>Subcategory</b>                            | <b>Description</b>                                                           |
|----------------------------------------------|-----------------------------------------------|------------------------------------------------------------------------------|
| <b>1. Author</b>                             |                                               | Last name, first name                                                        |
| <b>2. Year</b>                               |                                               | Year study conducted                                                         |
| <b>3. Country</b>                            |                                               |                                                                              |
| <b>4. Title</b>                              |                                               |                                                                              |
| <b>5. Objectives</b>                         |                                               | Stated objectives of the study                                               |
| <b>6. Study method classification</b>        | a. Qualitative<br>b. Quantitative<br>c. Mixed |                                                                              |
| <b>7. Study design</b>                       |                                               | Describe study's methodology and methods in detail.                          |
| <b>8. Study population</b>                   |                                               | Number of participants and describe population group under study.            |
| <b>9. Description of men</b>                 |                                               | Extract quotes/ describe how men and their roles are conceptualized in study |
| <b>10. Intervention – summary</b>            |                                               | Summarize intervention                                                       |
| <b>11. Intervention – mode of delivery</b>   |                                               | Settings, implementers, and modalities of implementation                     |
| <b>12. Intervention – length / intensity</b> |                                               | Time frame and frequency of implementation/ exposure                         |
| <b>13. Intervention – TOC</b>                |                                               | Summarize theory of change of intervention, if available                     |
| <b>14. Intervention TOC quote</b>            |                                               | Extract any quotes on intervention theory of change here                     |
| <b>15. Outcome variables</b>                 |                                               | Outcome measures                                                             |
| <b>16. Main Findings</b>                     |                                               | Main findings with respect to men                                            |
| <b>17. Notes</b>                             |                                               |                                                                              |
