# Supplementary material for: Changing men or changing health systems? A scoping review of interventions, services and programmes targeting men’s health in sub-Saharan Africa
Source: PubMed Central journal article supplement (PMC8011198; doi:10.1186/s12939-021-01428-z), 2021-03-31
Supplement: 12939_2021_1428_MOESM3_ESM.pdf [file 12939_2021_1428_MOESM3_ESM.pdf]

*Appendix 2: Eligibility criteria*

| <b>Domain</b>                    | <b>Criteria</b>                                                                                                                               |
|----------------------------------|-----------------------------------------------------------------------------------------------------------------------------------------------|
| <b>Time restriction</b>          | Study published since 2000 (motivated by the desire to focus on recent evidence in this field)                                                |
| <b>Language restriction</b>      | Study published in English, French, Portuguese.                                                                                               |
| <b>Population</b>                | Study focuses on men; at least 15 years old; of any sexual orientation.                                                                       |
| <b>Intervention</b>              | Study reports on services, programmes, and interventions                                                                                      |
|                                  | Study reports a theory of change and/or offers an account of intervention implementation and results.                                         |
| <b>Outcomes or topical focus</b> | Study outcomes or study focus include health literacy or engagement with health services or health seeking.                                   |
| <b>Country setting</b>           | Study is conducted in one of the 47 countries of the Sub-Saharan Africa region.                                                               |
| <b>Study type</b>                | Study is a qualitative study of any type; or a quantitative study (including controlled before and after, interrupted time series or trials). |
